# Supplementary material for: Functionality of Native Starches in Food Systems: Cluster Analysis Grouping of Rheological Properties in Different Product Matrices
Source: Foods. 2020 Aug 6;9(8):1073. doi: 10.3390/foods9081073 (PMC7464650; doi:10.3390/foods9081073)
Supplement: Supplementary file 1 [file foods-09-01073-s001.xlsx]

## Sheet: Table S1 Model systems
Table S1. Pastingcharacteristics, rheological properties and texture parameters of 5% native starch pastes with presence of cosolutes
Starch botanical origin	Variety	Cosolute	GT	FV	BD	SB	CI	FI	TX	HA	AD	CO	SP	GU
Potato	Normal	-	62	1133	1319	621	31.86	0.468	49535	0.42	-0.21	0.74	0.99	0.31
Potato	Waxy	-	64.8	612	888	233	10.93	0.4951	10053.5	0.35	0	0.73	1	0.26
Corn	Normal	-	84.5	296	6	149	13.11	0.3869	7208	0.57	-0.92	0.78	0.96	0.44
Corn	Waxy	-	68.7	348	422	140	5.47	0.5083	5503	0.34	0	0.74	1	0.25
		0.03
Potato	Normal	NaCl	66.8	1163	0	725	25.45	0.4156	24060	0.42	-0.45	0.74	1	0.31
Potato	Waxy	NaCl	69.1	555	593	160	13.035	0.45585	16400	0.34	0	0.73	1	0.25
Corn	Normal	NaCl	87.1	232	0	69	5.645	0.4535	1832	0.39	-0.16	0.74	0.98	0.29
Corn	Waxy	NaCl	76	348	371	123	6.083	0.5018	6647	0.35	0	0.73	1	0.25
Potato	Normal	KCl	66	1193	3	716	26.84	0.4074	24213	0.483333	-0.59	0.720163	0.974349	0.974349
Potato	Waxy	KCl	68.6	539	684	178	10.22	0.4919	14227	0.34	0	0.74	1	1
Corn	Normal	KCl	85.8	262	2	97	6.011	0.4633	1968	0.43	-0.366667	0.753201	0.976711	0.976711
Corn	Waxy	KCl	75.9	330	357	112	4.22	0.5556	4789	0.346667	0	0.735016	1	1
		0.1
Potato	Normal	Sucrose	64.8	1169	906	583	38.095	0.4436	43435	0.5	-0.29	0.73	0.96	0.37
Potato	Waxy	Sucrose	67	747	1137	281	17.46	0.4774	19005	0.37	-0.01	0.73	1	0.27
Corn	Normal	Sucrose	83.7	355	2	140	25.62	0.3273	11063	1	-3.66	0.8	0.98	0.8
Corn	Waxy	Sucrose	70.6	430	490	170	7.438	0.5072	8059	0.37	0	0.72	0.99	0.27
Potato	Normal	Sorbitol	63.9	1385	1310	768	25.11	0.5215	29213	0.43	-0.23	0.736746	0.992908	0.316582
Potato	Waxy	Sorbitol	66.7	811	1146	320	16.65	0.49	15117	0.37	-0.02	0.735915	1	0.272289
Corn	Normal	Sorbitol	82.2	410	17	196	19.43	0.3894	9236	0.67	-2.24333	0.735891	0.980356	0.490659
Corn	Waxy	Sorbitol	70	426	488	157	6.44	0.5292	7071	0.36	0	0.726892	1	0.261681
Potato	Normal	Xylitol	64.1	1325	1272	719	24.1	0.5193	30357	0.426667	-0.226667	0.730355	1.0013	0.311478
Potato	Waxy	Xylitol	66.9	786	1129	308	15.32	0.4978	15893	0.37	-0.0266667	0.731701	1	0.27073
Corn	Normal	Xylitol	81.9	420	19	211	26.305	0.3372	11890	0.626667	-1.68667	0.754965	0.994444	0.473173
Corn	Waxy	Xylitol	69.8	433	500	181	5.9177	0.5428	6623.3	0.36	0	0.732006	0.990991	0.263503
Potato	Normal	Erythritol	63.8	1362	1235	735	28.2	0.4975	36087	0.433333	-0.25	0.730434	0.985816	0.316436
Potato	Waxy	Erythritol	66.7	773	1127	294	17.19	0.4733	14950	0.366667	-0.00666667	0.73067	1	0.26791
Corn	Normal	Erythritol	81.9	394	20	194	23.42	0.3356	10472.5	0.606667	-1.46333	0.743611	0.994949	0.451237
Corn	Waxy	Erythritol	69.7	411	484	165	5.876	0.5311	6366.7	0.353333	0	0.734598	1	0.259549
Potato	Normal	Glycerol	63.9	1382	1127	749	21.37	0.5378	35840	0.41	-0.203333	0.735222	1	0.301423
Potato	Waxy	Glycerol	66.8	739	1144	279	13.2	0.5051	13657	0.376667	-0.0633333	0.736487	1	0.277381
Corn	Normal	Glycerol	81.9	373	23	182	17.79	0.3701	9868.5	0.586667	-1.57667	0.760779	1.01121	0.446359
Corn	Waxy	Glycerol	69.8	395	468	152	4.745	0.5487	4813	0.35	0	0.736063	1	0.257622
Explanatory notes: GT–gelatinization temperature; FV–final viscosity; BD–breakdown; SB–setback; CI–consistency index; FI–flow behaviour index; TX–thixotropy; HA–hardness; AD–adhesiveness; CO–cohesiveness; SP-springiness; GU–gumminess.

## Sheet: Table S2 Food products
Table S2: Rheological properties and texture parameters of food products thickened with native starch preparations
Starch botanical origin	Variety	Product	CI	FI	TX	HA	AD	CO	SP	GU
Potato	Normal	Ketchup	13.815	0.36765	-923.7	0.776667	-4.04667	0.804588	0.970023	0.624926
Potato	Waxy	Ketchup	27.13	0.31675	12270	0.56	-1.5	0.8051	1	0.450856
Corn	Normal	Ketchup	8.7745	0.34985	1081.4	0.526667	-0.776667	0.80134	0.987421	0.422032
Corn	Waxy	Ketchup	25.835	0.2735	13030	0.52	-1.11667	0.801445	1.01295	0.416584
Potato	Normal	Mayonnaise	5.8605	0.547	16420	1.34667	-9.17	0.708197	0.966169	0.954734
Potato	Waxy	Mayonnaise	16.875	0.3697	17004	1.46667	-8.03333	0.696008	0.979545	1.02076
Corn	Normal	Mayonnaise	19.845	0.4723	-7191.5	0.783333	-7.22667	0.861999	1.00877	0.675205
Corn	Waxy	Mayonnaise	50.91	0.396	37190	0.523333	-1.81667	0.754542	0.962437	0.394667
Potato	Normal	Jelly	66.73	0.3323	40590	1.33	-4.71333	0.67842	0.926657	0.89145
Potato	Waxy	Jelly	5.823	0.6014	10147.5	0.366667	-0.0433333	0.677514	1	0.248314
Corn	Normal	Jelly	20.27	0.38175	3349	1.19	-12.5767	0.66557	0.862955	0.791466
Corn	Waxy	Jelly	1.0584	0.7845	-1921.5	0.34	0	0.734465	1	0.249718
Potato	Normal	Pudding	700.55	0.01552	209800	3.87333	-18.03	0.6361	0.92445	2.45189
Potato	Waxy	Pudding	63.915	0.36065	72015	0.586667	-1.35	0.683048	0.915866	0.399766
Corn	Normal	Pudding	83.05	0.24675	23155	4.28667	-34.5567	0.541268	0.905857	2.23437
Corn	Waxy	Pudding	110.5	0.21325	51140	1.21	-1.57	0.626066	0.89863	0.756166
Explanatory notes: GT–gelatinization temperature; FV–final viscosity; BD–breakdown; SB–setback; CI–consistency index; FI–flow behaviour index; TX–thixotropy; HA–hardness; AD–adhesiveness; CO–cohesiveness; SP-springiness; GU–gumminess.
